# Supplementary material for: Unusual Hemiaulus bloom influences ocean productivity in Northeastern US Shelf waters
Source: Copernicus journal article supplement (doi:10.5194/bg-21-1235-2024), 2024-03-13
Supplement: Supplementary file 1 [file bg-21-1235-2024-supplement.pdf]

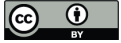

*Supplement of*

## **Unusual *Hemiaulus* bloom influences ocean productivity in Northeastern US Shelf waters**

**S. Alejandra Castillo Cieza et al.**

*Correspondence to:* Rachel H. R. Stanley ([rachel.stanley@wellesley.edu](mailto:rachel.stanley@wellesley.edu))

The copyright of individual parts of the supplement might differ from the article licence.

Table S1. Cruise details for NES-LTER broadscale IFCB sampling conducted in partnership with NOAA programs in the period 2013 – 2023; *Hemiaulus* biomass concentrations derived from these observations are summarized in Fig. S1. Program abbreviations: Ecosystem Monitoring Program (EcoMon), Harmful Algal Bloom Cyst Surveys (HAB Cyst), Atlantic Marine Assessment Program for Protected Species (AMAPPS).

| Cruise ID | IFCB sample dates                                   | Program name | Ship                       |
|-----------|-----------------------------------------------------|--------------|----------------------------|
| EX1305    | 24 Aug 2013 – 04 Sep 2013                           | EcoMon       | NOAA Ship Okeanos Explorer |
| EX1306    | 06 Nov 2013 – 11 Nov 2013                           | HAB Cyst     | NOAA Ship Okeanos Explorer |
| HB1502    | 19 May 2015 – 02 Jun 2015                           | EcoMon       | NOAA Ship Henry B Bigelow  |
| GU1506    | 13 Oct 2015 – 25 Oct 2015                           | EcoMon       | NOAA Ship Gordon Gunter    |
| HB1507    | 12 Nov 2015 – 17 Nov 2015                           | HAB Cyst     | NOAA Ship Henry B Bigelow  |
| GU1608    | 21 May 2016 – 16 Jun 2016                           | EcoMon       | NOAA Ship Gordon Gunter    |
| HB1603    | 28 Jun 2016 – 14 Jul 2016                           | AMAPPS       | NOAA Ship Henry B Bigelow  |
| PC1607    | 08 Aug 2016 – 19 Aug 2016                           | EcoMon       | NOAA Ship Pisces           |
| PC1609    | 19 Oct 2016 – 20 Oct 2016                           | EcoMon       | NOAA Ship Pisces           |
| PC1610    | 12 Nov 2016 – 18 Nov 2016                           | HAB Cyst     | NOAA Ship Pisces           |
| HB1701    | 11 Feb 2017 – 23 Feb 2017                           | EcoMon       | NOAA Ship Henry B Bigelow  |
| GU1701    | 17 May 2017 – 07 Jun 2017                           | EcoMon       | NOAA Ship Gordon Gunter    |
| GU1706    | 31 Oct 2017 – 09 Nov 2017                           | EcoMon       | NOAA Ship Gordon Gunter    |
| HB1803    | 23 May 2018 – 05 Jun 2018                           | EcoMon       | NOAA Ship Henry B Bigelow  |
| GU1804    | 22 Aug 2018 – 31 Aug 2018                           | EcoMon       | NOAA Ship Gordon Gunter    |
| S11802    | 02 Nov 2018 – 13 Nov 2018                           | EcoMon       | R/V Hugh R Sharp           |
| HB1902    | 23 May 2019 – 04 Jun 2019                           | EcoMon       | NOAA Ship Henry B Bigelow  |
| GU1902    | 15 Aug 2019 – 30 Aug 2019                           | EcoMon       | NOAA Ship Gordon Gunter    |
| GU1905    | 15 Oct 2019 – 01 Nov 2019                           | EcoMon       | NOAA Ship Gordon Gunter    |
| GU2102    | 14 May 2021 – 26 May 2021                           | EcoMon       | NOAA Ship Gordon Gunter    |
| HB2102    | 16 Jun 2021 – 7 Jul 2021<br>28 Jul 2021-23 Aug 2021 | AMAPPS       | NOAA Ship Henry B Bigelow  |
| PC2104    | 05 Aug 2021 – 18 Aug 2021                           | EcoMon       | NOAA Ship Pisces           |
| PC2106    | 16 Oct 2021 – 25 Oct 2021                           | EcoMon       | NOAA Ship Pisces           |
| HB2204    | 31 May 2022 – 04 Jun 2022                           | EcoMon       | NOAA Ship Henry B Bigelow  |
| PC2205    | 01 Nov 2022 – 10 Nov 2022                           | EcoMon       | NOAA Ship Pisces           |
| HB2302    | 09 Jun 2023 – 28 Jun 2023                           | EcoMon       | NOAA Ship Henry B Bigelow  |

**Table S2.** Locations of the mid-shelf stations on the NES-LTER cruises and the date and time when each CTD cast occurred. Water from the casts was used to quantify the various productivity metrics. GOP and NCP data were collected at all these stations as well as at points between stations. NPP and microzooplankton data were collected at times noted by \*. Only microzooplankton grazing data were collected at times marked by +.

| Station | Latitude | Longitude | 2018                    | 2019        | 2020        | 2021        | 2022        |
|---------|----------|-----------|-------------------------|-------------|-------------|-------------|-------------|
| L3      | 40.863°N | 70.883°W  | 7/21 06:39 <sup>+</sup> | 8/21 07:38  | 7/25 21:37  | 7/21 02:12  | 8/2 21:14   |
| L4      | 40.697°N | 70.883°W  | 7/21 14:51 <sup>+</sup> | 8/24 05:17* | 7/26 11:06* | 7/17 13:18* | 7/30 11:42* |
| L5      | 40.530°N | 70.883°W  | 7/21 17:23              | 8/24 02:50  | 7/26 19:03  | 7/17 15:41  | 7/13 14:06  |
| L6      | 40.197°N | 70.883°W  | 7/22 02:08              | 8/21 20:27* | 7/28 01:54  | 7/20 09:21* | 8/2 03:22*  |

**Table S3.** Mixed layer depths, in m, for each NES-LTER station (listed in the top row) for all the summer NES-LTER cruises used in this paper. The starting month and year of the cruise are listed next to the cruise name.

| Cruise ID | Cruise starting date | L1 | L2 | L3 | L4 | L5 | L6 | L7 | L8 | L9 | L10 |
|-----------|----------------------|----|----|----|----|----|----|----|----|----|-----|
| EN617     | 7/2018               | 6  | 6  | 8  | 6  | 10 | 9  | 16 | 15 | 14 | 13  |
| EN644     | 8/2019               | 5  | 6  | 6  | 10 | 9  | 6  | 7  | 16 | 6  | 15  |
| EN655     | 7/2020               | 6  | 8  | 6  | 9  | 7  | 7  | 7  | —  | 6  | 10  |
| EN668     | 7/2021               | 6  | 6  | 9  | 6  | 9  | 13 | 13 | 10 | 10 | 9   |
| EN687     | 7/2022               | 7  | 7  | 9  | 6  | 10 | 11 | 15 | 11 | 7  | 9   |

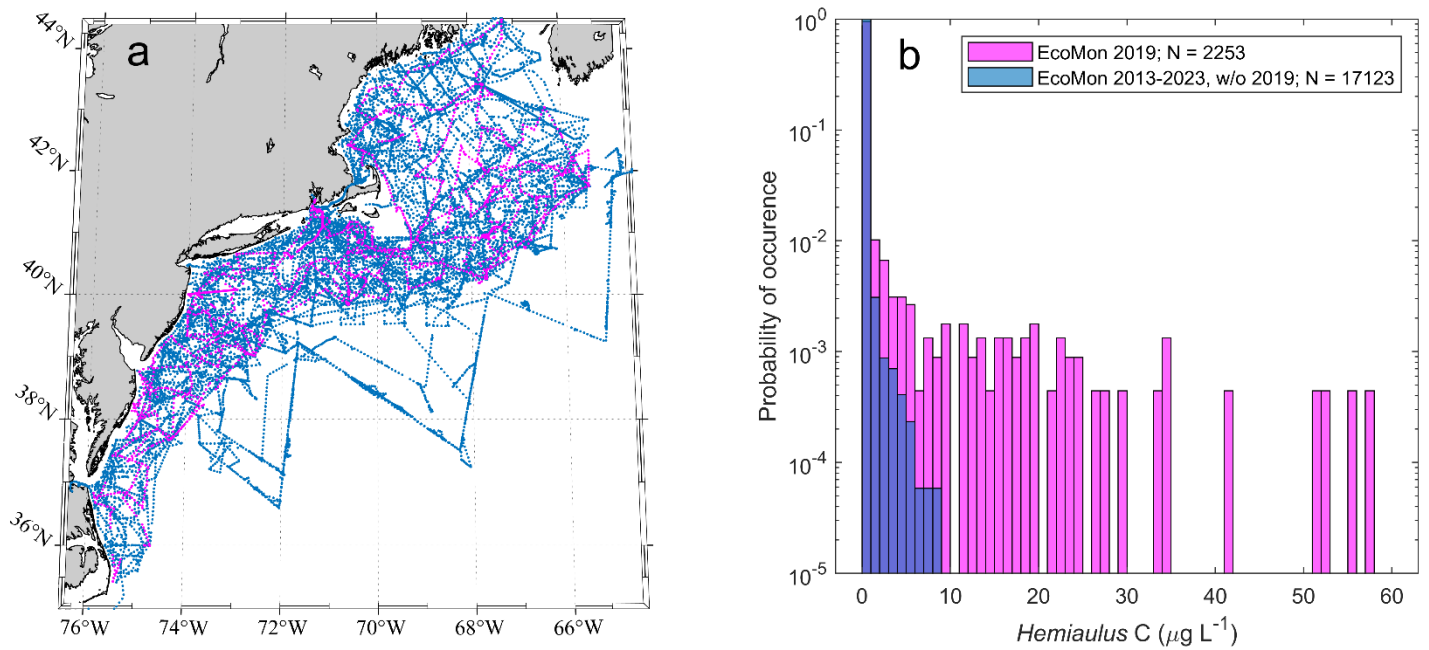

**Fig. S1.** IFCB-based observations of carbon concentration associated with *Hemiaulus* collected across the NES broadscale cruise over the last decade emphasize the extreme nature of the high concentrations observed in 2019. (a) Map of automated IFCB measurement locations on 26 broadscale survey cruises conducted in the period 2013-2023 in partnership with NOAA's National Marine Fisheries Service, through their EcoMon program plus a couple of other ship-based observational programs (AMAPPS, HAB cyst surveys). IFCB sample locations ( $N = 19376$ ) extend across the continental shelf from North Carolina to Maine, with the sampling distribution over the three 2019 cruises ( $N = 2253$ ) highlighted by magenta coloring. (b) Normalized histograms of *Hemiaulus* carbon concentration in 2019 (magenta bars) and for all years except 2019 (blue bars). While most observations had undetectable *Hemiaulus* ( $0 \text{ mgC L}^{-1}$ ) in both periods (94.9% in 2019; 99.4% in all other years), the high concentration tail in 2019 is extraordinary compared to the rest of the decade.

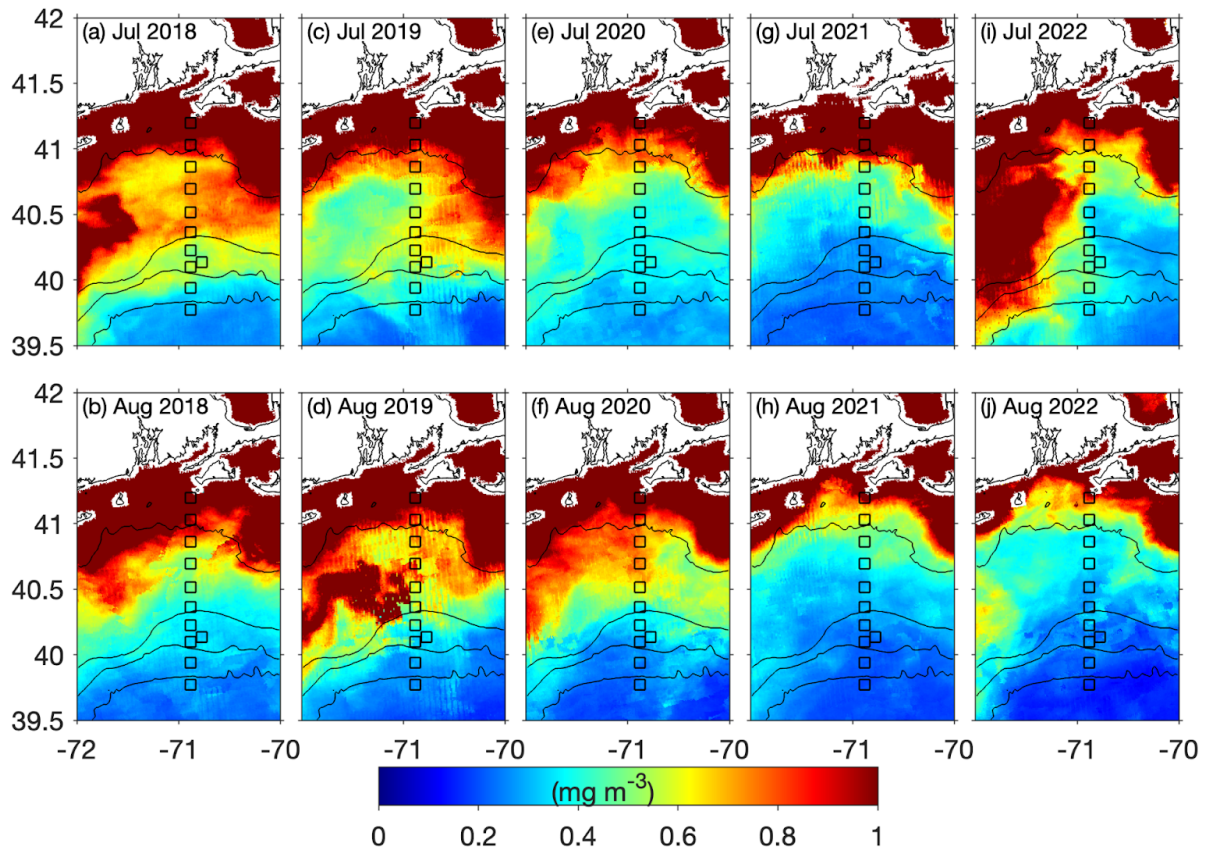

**Fig S2.** Monthly mean sea surface chlorophyll concentration on the New England shelf in July and August of 2018-2022. The squares mark NES-LTER stations (Table S2) and the black lines are bathymetric contours corresponding to 50, 100, 200, 1000 m.

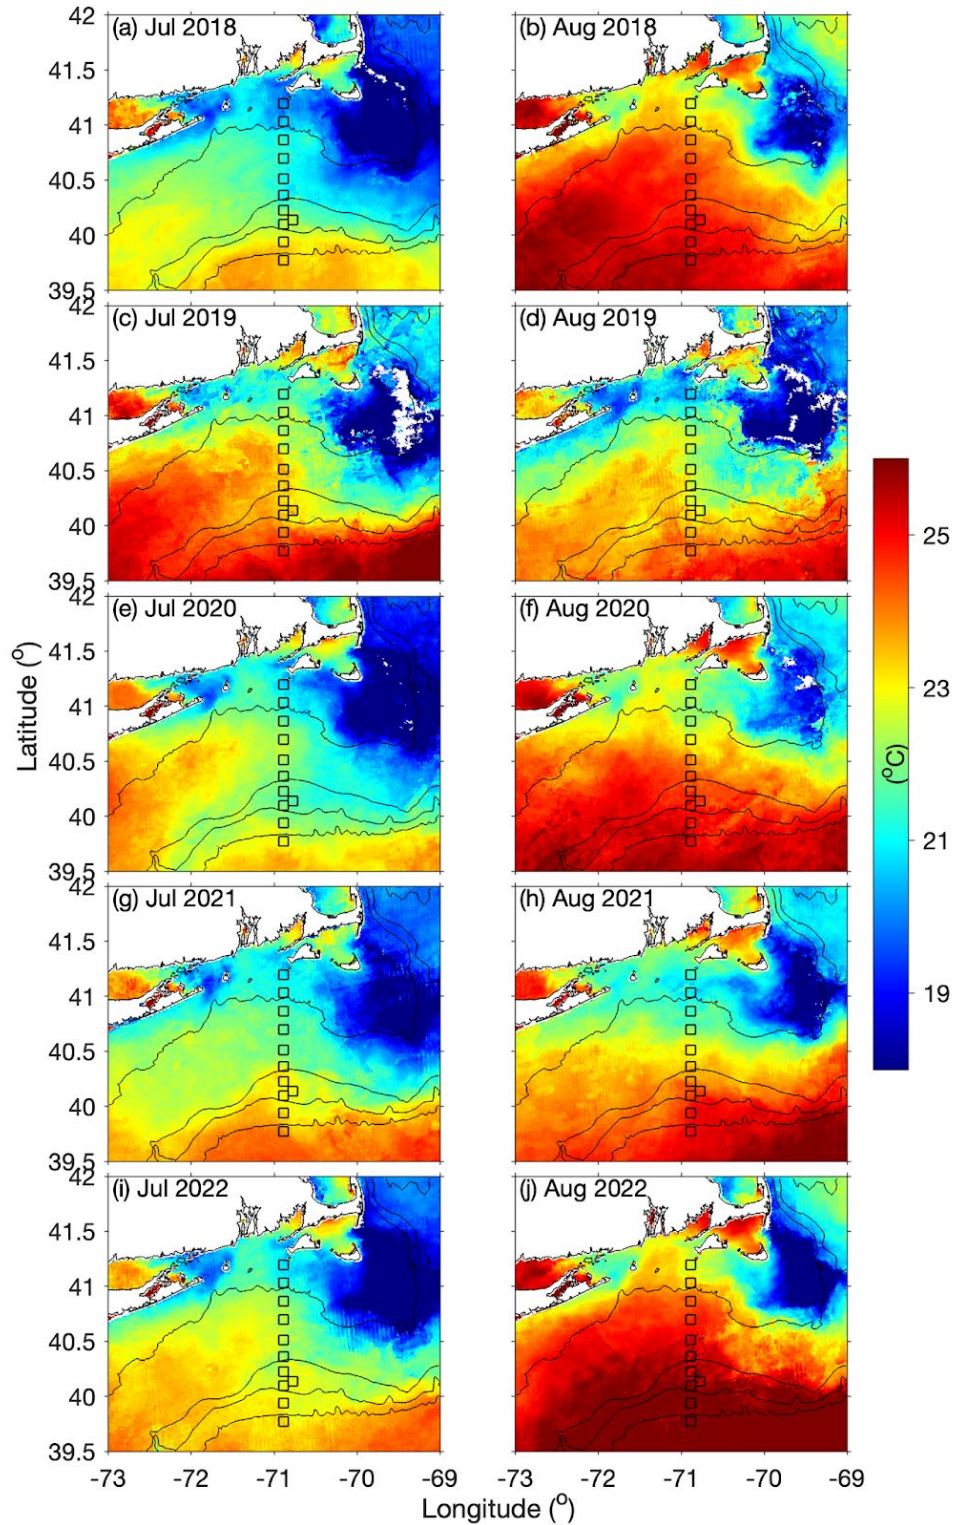

**Fig S3.** Monthly mean sea surface temperature on the New England shelf in July and August, 2018-2022. The square symbols are NES-LTER stations (Table S2); the black lines are bathymetric contours of 50, 100, 200, 1000 m.



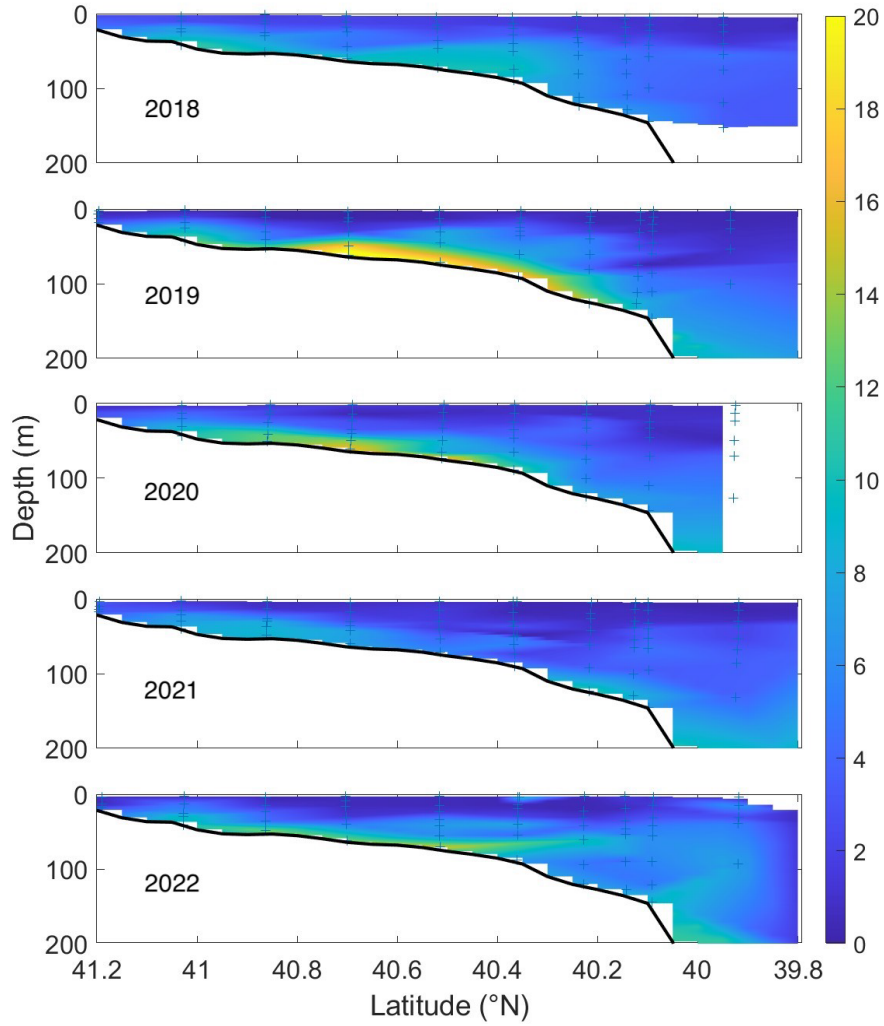

**Fig S4.** Silicate concentration as a function of depth and latitude for the NES-LTER summer cruises 2018-2022 (from top to bottom). Niskin sample locations (+) are indicated on each section.

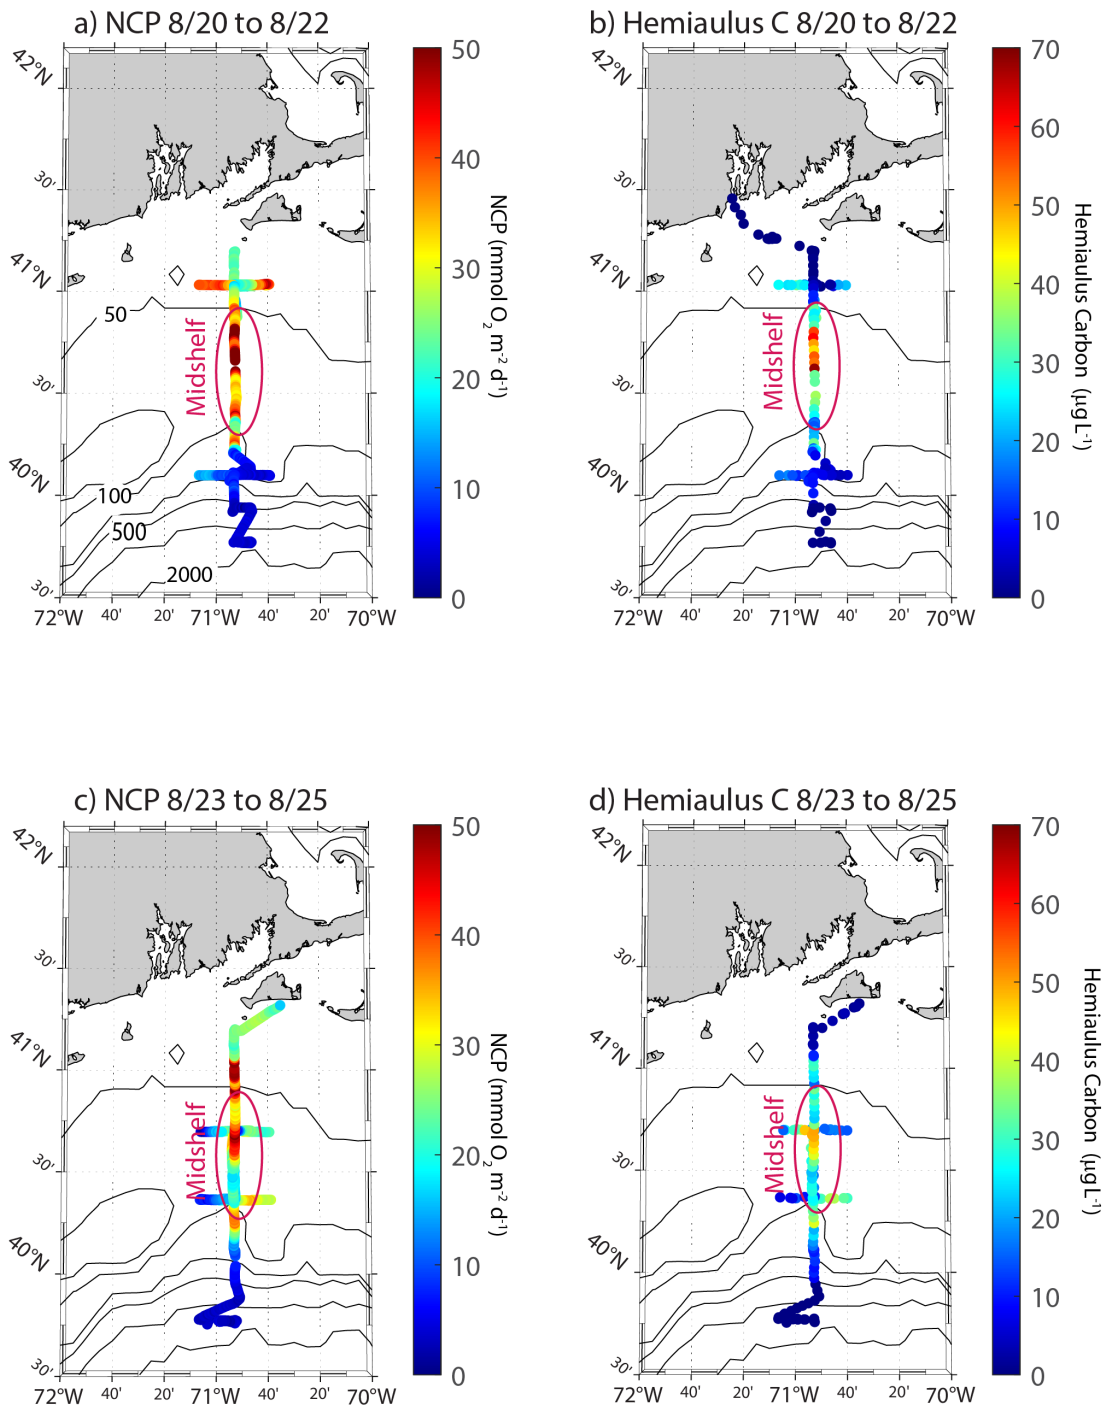

**Fig. S5.** Rates of net community production and *Hemiaulus* carbon in the first half of the cruise (panels a and b) and the second half of the cruise (panels c and d). The mid-shelf region is highlighted with the red ellipse for each panel and bathymetry contours are labelled in the first panel. Note that the later time period has smaller NCP and lower amounts of *Hemiaulus* carbon, suggesting the bloom may have been in decline.



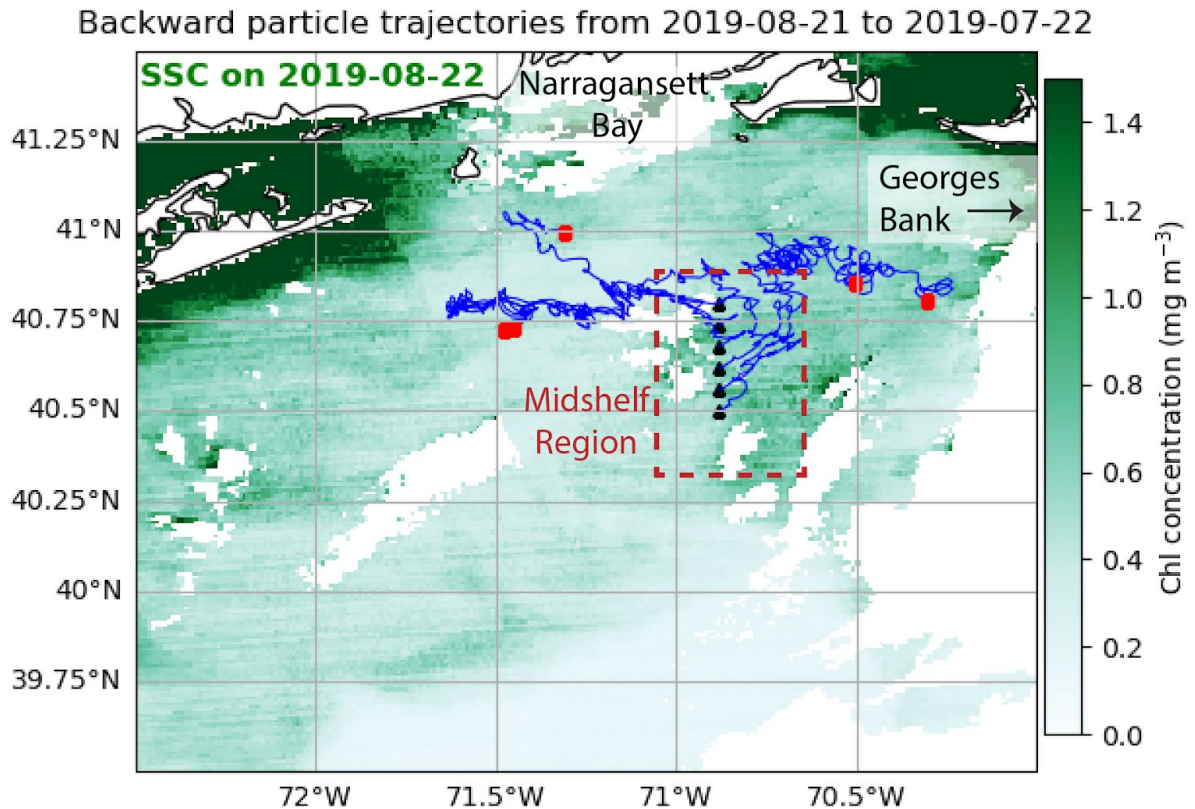

**Fig S6.** Backward particle trajectories beginning along the mid-shelf stations from the NES-LTER transect line (shown in black triangles) on 21 Aug , 2019 suggest that the *Hemiaulus* bloom water came from the inner shelf region near Narragansett Bay and Georges Bank rather than mid-shelf region further south. The red squares indicate the positions of the particles on 22 Jul, 2019. The background color shows the satellite-measured surface chlorophyll concentration on 22 Aug, 2019.
